# Supplementary material for: A cysteine-activated fluorescent H2S donor for visualizing H2S release and alleviating cellular inflammation
Source: Royal Society of Chemistry journal article supplement (doi:10.1039/d4cc04655b), 2024-10-29
Supplement: d4cc04655b1.pdf [file d4cc04655b1.pdf]

## Supporting Information

### A cysteine-activated fluorescent H<sub>2</sub>S donor for visualizing H<sub>2</sub>S release and alleviating cellular inflammation

Nianwei Wang, Xuan Wang, Jicheng Wang, Yikun Ren, Huiming Hua\*, Dahong Li\*

Key Laboratory of Structure-Based Drug Design & Discovery, Ministry of Education, and School of Traditional Chinese Materia Medica, Shenyang Pharmaceutical University, 103 Wenhua Road, Shenyang 110016, PR China.

Email: lidahong0203@163.com (D. Li); huimhua@163.com (H. Hua).

#### Table of contents

|                                                                                      |     |
|--------------------------------------------------------------------------------------|-----|
| 1. Materials and methods                                                             | S2  |
| 2. Synthesis                                                                         | S4  |
| 3. Test systems and spectral measurements                                            | S6  |
| 4. Optical response experiment of <b>Bcy-NCS</b> to Cys                              | S6  |
| 5. Fluorescence response kinetics and photostability experiment of <b>Bcy-NCS</b>    | S7  |
| 6. Verification experiment for the reaction mechanism between Cys and <b>Bcy-NCS</b> | S7  |
| 7. pH stability and biological media selectivity experiments of <b>Bcy-NCS</b>       | S9  |
| 8. H <sub>2</sub> S release experiment of <b>Bcy-NCS</b>                             | S10 |
| 9. Cell culture and cytotoxicity assays                                              | S12 |
| 10. Cellular imaging experiments                                                     | S13 |
| 11. Anti-inflammatory studies of <b>Bcy-NCS</b>                                      | S13 |
| 12. NMR spectra and HRMS                                                             | S14 |
| 13. References                                                                       | S19 |

## 1. Materials and methods

Except for piperidine and diethyl ether, which were provided by the reagent library of Shenyang Pharmaceutical University, anhydrous ACN, which was prepared by distillation, and the H<sub>2</sub>S fluorescent probe **AzMC**, which was synthesized according to the literature, all other biological and chemical reagents, raw materials, and solvents were purchased from Adamas or Macklin. The purity of all raw materials was above 98%, and all solvents were of analytical grade or higher, with water content in anhydrous solvents below 50 ppm. Unless otherwise specified, further purification was not necessary prior to use. Lipopolysaccharide (LPS) and the Griess reagent kit were purchased from Beyotime. High-performance thin-layer chromatography plates (model: GF254) were purchased from Qingdao Marine Chemical Factory, and silica gel for column chromatography was 100-200 mesh and 200-300 mesh.

Fluorescence emission spectra were recorded on a fluorescence spectrophotometer (Hitachi F-7100). Absorption spectra were measured on a UV-visible spectrometer (UV-2201 spectrometer). Nuclear magnetic resonance (NMR) spectra were obtained using a Bruker-ARX-600 running at 600 MHz. Chemical shifts ( $\delta$ ) were referenced to residual DMSO-*d*<sub>6</sub> (<sup>1</sup>H NMR, 2.50) and CDCl<sub>3</sub> (<sup>1</sup>H NMR, 7.26). High-resolution mass spectra (HRMS) were measured on a mass spectrometer (AB SCIEX Triple TOF5600) and the compound decomposition mechanism was verified. Live cell imaging was performed using an inverted fluorescence microscope (Olympus IX73). The cytotoxicity assay and cellular NO<sub>2</sub><sup>-</sup> levels were recorded by measuring absorbance at 450 nm and 540 nm using a microplate reader (Thermo Varioskan Flash).

**Table S1** Comparison of **Bey-NCS** with the reported Cys probes.

| Chemical structure                                                                  | $\lambda_{ex}/\lambda_{em}$<br>(nm) | Stoke shift      | Limit of detection             | H <sub>2</sub> S release function | Applications                                                       | Ref.                 |
|-------------------------------------------------------------------------------------|-------------------------------------|------------------|--------------------------------|-----------------------------------|--------------------------------------------------------------------|----------------------|
| 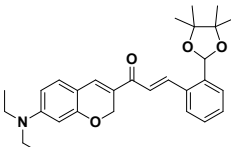   | 460/498                             | 38 nm            | 14 $\mu$ M                     | -                                 | Cell imaging                                                       | 1                    |
|    | 549/584                             | 35 nm            | 0.29 $\mu$ M                   | -                                 | Food detection                                                     | 2                    |
|    | 410/495                             | 85 nm            | 14 nM                          | -                                 | Cell imaging                                                       | 3                    |
|   | 480/547                             | 67 nm            | 3.3 $\mu$ M                    | -                                 | Cell imaging                                                       | 4                    |
|  | 450/580                             | 130 nm           | 1.4 $\mu$ M                    | -                                 | Cell imaging,<br>Zebrafish imaging                                 | 5                    |
|  | 470/540<br>, 585                    | 70 nm,<br>115 nm | 0.13 $\mu$ M<br>(585 nm)       | -                                 | Human plasma<br>detection                                          | 6                    |
|  | 370/485                             | 115 nm           | 0.29 $\mu$ M                   | -                                 | Cell imaging                                                       | 7                    |
|  | 390/518                             | 128 nm           | 51 nM                          | Yes                               | Cell imaging,<br>Zebrafish imaging                                 | 8                    |
|  | 430/590                             | 160 nm           | 0.70 $\mu$ M                   | -                                 | Cell imaging                                                       | 9                    |
|  | <b>520/576</b>                      | <b>56 nm</b>     | <b>0.193 <math>\mu</math>M</b> | <b>Yes</b>                        | <b>Cell imaging,<br/>Cellular<br/>inflammation<br/>alleviation</b> | <b>This<br/>work</b> |

## 2. Synthesis

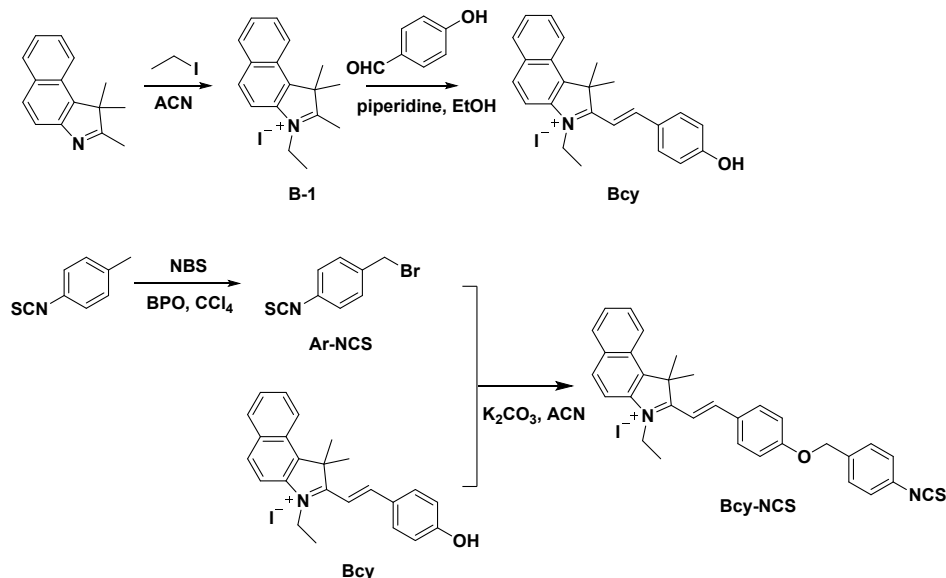

Scheme S1. Synthetic procedure of the **Bcy-NCS**.

### Synthesis of **B-1**<sup>10</sup>

1,1,2-trimethyl-1H-benz[e]indole (500 mg, 2.39 mmol) was dissolved in 40 mL of ACN. Under a nitrogen atmosphere, iodoethane (250  $\mu$ L, 3.63 mmol) was added, and the mixture was stirred under reflux at 80  $^{\circ}$ C for 24 h. After confirming the completion of the reaction by TLC, the solvent was evaporated under reduced pressure. The crude product was then ground with a small amount of diethyl ether, filtered, and the filter cake was washed 2-3 times with a small amount of cold diethyl ether. The filter cake was dried to yield a silver-gray solid, **B-1** (700 mg, 81%). <sup>1</sup>H NMR (600 MHz, DMSO-*d*<sub>6</sub>)  $\delta$ : 8.37 (d, *J* = 8.4 Hz, 1H), 8.30 (d, *J* = 8.9 Hz, 1H), 8.22 (d, *J* = 8.2 Hz, 1H), 8.16 (d, *J* = 8.9 Hz, 1H), 7.79 (t, *J* = 7.6 Hz, 1H), 7.73 (t, *J* = 7.5 Hz, 1H), 4.62 (q, *J* = 7.3 Hz, 2H), 2.94 (s, 3H), 1.76 (s, 6H), 1.51 (t, *J* = 7.3 Hz, 3H).

### Synthesis of **Bcy**<sup>10</sup>

**B-1** (600 mg, 2.5 mmol) and *p*-hydroxybenzaldehyde (370 mg, 3 mmol) were dissolved in 6 mL of anhydrous ethanol. After complete dissolution, 150  $\mu$ L of piperidine was added. The reaction mixture was then refluxed overnight at 80-85  $^{\circ}$ C under a nitrogen atmosphere. Upon confirming the completion of the reaction by TLC, the reaction mixture was filtered under vacuum, and the filter cake was washed with a small amount of cold ethanol. The filter cake was dried to yield a purplish-red solid, **Bcy** (540 mg, 70%). <sup>1</sup>H NMR (600 MHz, CDCl<sub>3</sub>)  $\delta$ : 8.08 (d, *J* = 9.4 Hz, 1H), 7.91 (t, *J* = 7.8 Hz, 2H), 7.76 (d, *J* = 14.0 Hz, 1H), 7.61 – 7.49 (m, 3H), 7.43 (t, *J* = 7.0 Hz, 1H), 7.28 (s, 1H), 6.56 (d, *J* = 9.1 Hz, 2H), 6.27 (d, *J* = 14.0 Hz, 1H), 4.10 (q, *J* = 7.3 Hz,

2H), 1.99 (s, 6H), 1.46 (t,  $J = 7.3$  Hz, 3H).  $^{13}\text{C}$  NMR (150 MHz,  $\text{CDCl}_3$ )  $\delta$ : 147.23, 139.29, 132.82, 131.57, 130.56, 130.09, 128.32, 127.72, 124.70, 124.56, 122.12, 121.94, 109.96, 96.32, 77.24, 77.03, 76.82, 50.64, 39.19, 27.68, 12.56.

### Synthesis of Ar-NCS<sup>11</sup>

*p*-tolyl isothiocyanate (1.49 g, 10 mmol) and *N*-bromosuccinimide (1.79 g, 10 mmol) were dissolved in 20 mL of anhydrous  $\text{CCl}_4$ . A catalytic amount of benzoyl peroxide (24.2 mg, 0.1 mmol) was then added, and the mixture was stirred under reflux at 80 °C for 12 h. After confirming the completion of the reaction by TLC, the reaction mixture was filtered, and the filtrate was evaporated under reduced pressure. The residue was dissolved in DCM and the solution was washed three times with saturated sodium thiosulfate until the organic layer was free of any apparent reddish-brown color. After removing the solvent under reduced pressure, the product was recrystallized from methanol to obtain white crystals of **Ar-NCS** (1.2 g, 53%).  $^1\text{H}$  NMR (600 MHz,  $\text{CDCl}_3$ )  $\delta$ : 7.38 (d,  $J = 8.4$  Hz, 2H), 7.19 (d,  $J = 8.4$  Hz, 2H), 4.46 (s, 2H).  $^{13}\text{C}$  NMR (150 MHz,  $\text{CDCl}_3$ )  $\delta$ : 136.90, 136.16, 131.20, 130.21, 125.99, 32.17.

### Synthesis of Bcy-NCS

**Bcy** (50 mg, 0.15 mmol) and **Ar-NCS** (66 mg, 0.29 mmol) were dissolved in 5 mL of ACN followed by the addition of  $\text{K}_2\text{CO}_3$  (40.3 mg, 0.29 mmol) and KI (2.42 mg, 0.015 mmol). The reaction mixture was then reacted for 8 h at 60 °C under nitrogen protection. The reaction was monitored by TLC until completion, after which the reaction mixture was filtered and the filtrate was evaporated under reduced pressure. The residue was redissolved in DCM and washed 2-3 times with saturated brine, collecting the DCM layer each time. The DCM layer was dried over anhydrous  $\text{Na}_2\text{SO}_4$ , filtered, and concentrated under reduced pressure. The crude product was further purified by silica gel column chromatography (eluent: DCM:MeOH = 40:1) to afford the orange-yellow solid **Bcy-NCS** (36 mg, 36%).  $^1\text{H}$  NMR (600 MHz,  $\text{DMSO}-d_6$ )  $\delta$ : 8.53 (d,  $J = 16.2$  Hz, 1H), 8.42 (d,  $J = 8.5$  Hz, 1H), 8.28 (t,  $J = 9.1$  Hz, 3H), 8.22 (d,  $J = 8.2$  Hz, 1H), 8.11 (d,  $J = 8.9$  Hz, 1H), 7.81 (t,  $J = 7.7$  Hz, 1H), 7.72 (t,  $J = 7.6$  Hz, 1H), 7.63 – 7.56 (m, 3H), 7.50 (d,  $J = 8.3$  Hz, 2H), 7.26 (d,  $J = 8.7$  Hz, 2H), 5.32 (s, 2H), 4.82 (q,  $J = 7.3$  Hz, 2H), 2.02 (s, 6H), 1.50 (t,  $J = 7.2$  Hz, 3H).  $^{13}\text{C}$  NMR (150 MHz,  $\text{DMSO}-d_6$ )  $\delta$ : 182.31, 163.09, 153.24, 138.75, 138.59, 136.77, 133.62, 133.58, 131.53, 130.52, 130.15, 130.12, 129.74, 128.90, 128.20, 127.59, 127.27, 126.62, 123.55, 116.21, 113.54, 110.00, 69.38, 54.12, 42.60, 26.07, 14.34. HRMS (ESI):  $m/z$  calcd for  $\text{C}_{32}\text{H}_{29}\text{N}_2\text{OS}^+ [\text{M}]^+$  489.1995. Found 489.1992.

### 3. Test systems and spectral measurements

Preparation of solutions: An appropriate amount of donor **Bcy-NCS** was weighed and dissolved in DMSO to prepare a 10 mM stock solution. Similarly, an appropriate amount of Cys was weighed and dissolved in deionized water to prepare a 50 mM stock solution. Unless otherwise specified, this concentration of stock solutions was used for subsequent evaluation experiments.

UV absorption and fluorescence testing of donor **Bcy-NCS**: An appropriate amount of the donor stock solution was diluted with PBS buffer (pH = 7.4, 10 mM, 20% DMSO) to a final concentration of 10  $\mu$ M. Two separate solutions were prepared: one served as a blank, and the other was supplemented with the Cys stock solution to achieve a final concentration of 100  $\mu$ M. The solutions were then incubated in the dark at 37 °C for 1 h, after which the UV absorption and fluorescence emission spectra of the two solutions were measured. For the fluorescence testing of donor **Bcy-NCS**, an excitation wavelength of 520 nm was used, with excitation and emission slit widths set to 20 nm and 5 nm, respectively. Fluorescence intensity data were collected in the range of 550-650 nm.

### 4. Optical response experiment of Bcy-NCS to Cys

Preparation of a PBS buffer solution (pH = 7.4, 10 mM, 20% DMSO) containing **Bcy-NCS** at a final concentration of 10  $\mu$ M was performed. The Cys stock solution was then added to achieve final concentrations of 0, 50, 100, 150, 200, 250, 300, 350, 400, 450, and 500  $\mu$ M. Each solution was incubated in the dark at 37 °C for 1 h, and the fluorescence emission spectra were measured. Each concentration was measured in parallel three times.

The detection limit was calculated by plotting the fluorescence intensity of **Bcy-NCS** at 576 nm against the Cys concentration. The linear concentration range of Cys and the corresponding fluorescence intensity was determined, and the linear regression equation was calculated. Limit of detection (LOD) was then calculated using the formula  $LOD = 3\sigma/k$ , where  $k$  is the slope of the linear regression equation and  $\sigma$  is the standard deviation obtained from 11 measurements of the fluorescence intensity of the blank solution.

## 5. Fluorescence response kinetics and photostability experiment of

### Bcy-NCS

Prepare a PBS buffer solution (pH = 7.4, 10 mM, 20% DMSO) containing **Bcy-NCS** at a final concentration of 10  $\mu\text{M}$ . Add the Cys stock solution to achieve a concentration of 400  $\mu\text{M}$ , and measure the fluorescence emission spectra at 0 min, every 2 min from 1 to 59 min, and at 60 min. Each incubation time was measured in parallel three times.

Photostability Experiment: In the fluorescence kinetics experiments for **Bcy-NCS**, once the fluorescence intensity reached a plateau, the photostability was tested using the time-scan function of the fluorescence spectrophotometer for 1 h.

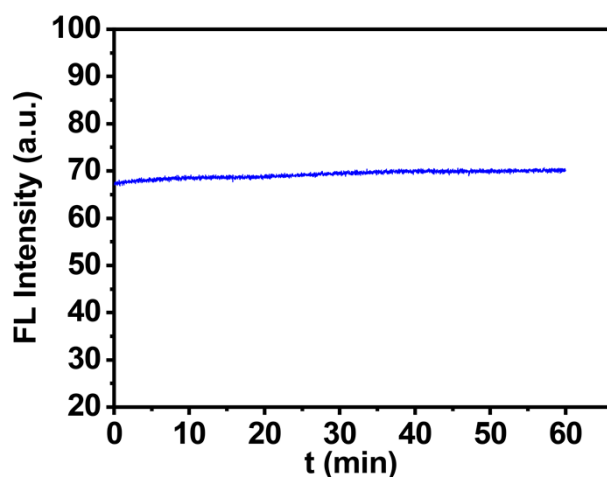

**Figure S1.** Photostability of **Bcy-NCS** (10  $\mu\text{M}$ ) after reacting with Cys (400  $\mu\text{M}$ ) for 1 h at the plateau phase. Test conditions:  $\lambda_{\text{ex}} = 520 \text{ nm}$ , slit width: 20/5 nm, PBS buffer solution (pH = 7.4, 10 mM, 20% DMSO) at 37  $^{\circ}\text{C}$ .

## 6. Verification experiment for the reaction mechanism between Cys and Bcy-NCS

A 10 mM stock solution of the donor Bcy-NCS was prepared in chromatographic-grade ACN. An aliquot of this stock solution was then diluted to 10  $\mu\text{M}$  with an ACN/ $\text{H}_2\text{O}$  (3:7, v/v) solution. Next, a Cys stock solution was added to achieve a final concentration of 100  $\mu\text{M}$ . Two experimental groups were established: one was incubated at 37  $^{\circ}\text{C}$  for 15 min, while the other was incubated at 37  $^{\circ}\text{C}$  for 1 h. After incubation, the mixtures from both groups were extracted and the organic layers were collected. Following solvent evaporation, the residues were re-dissolved in chromatographic-grade ACN. An appropriate amount of each solution was then diluted to 1  $\mu\text{M}$  using ACN. A 1 mL aliquot from each group was filtered through a 0.22  $\mu\text{m}$

microporous membrane into HPLC vials, and the compositions of the mixtures were then qualitatively analyzed by ESI-MS.

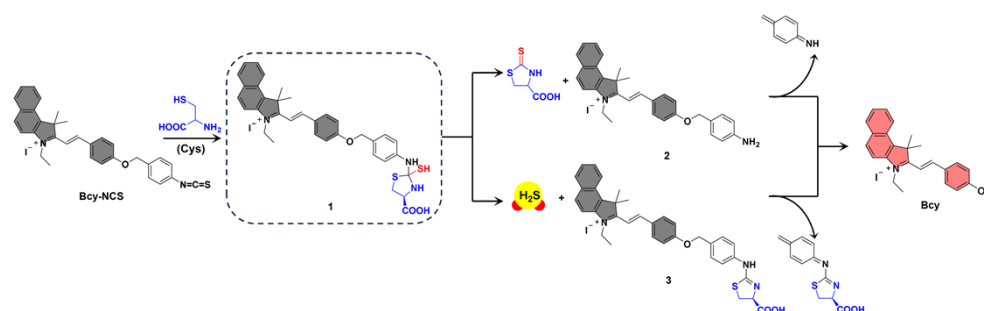

**Scheme S2.** Reaction mechanism of Bcy-NCS with Cys

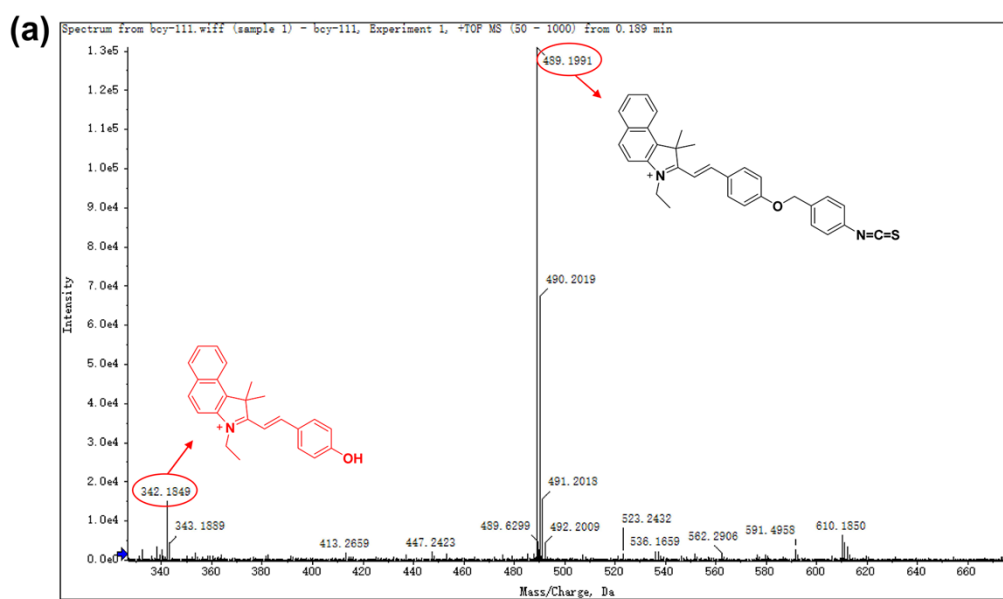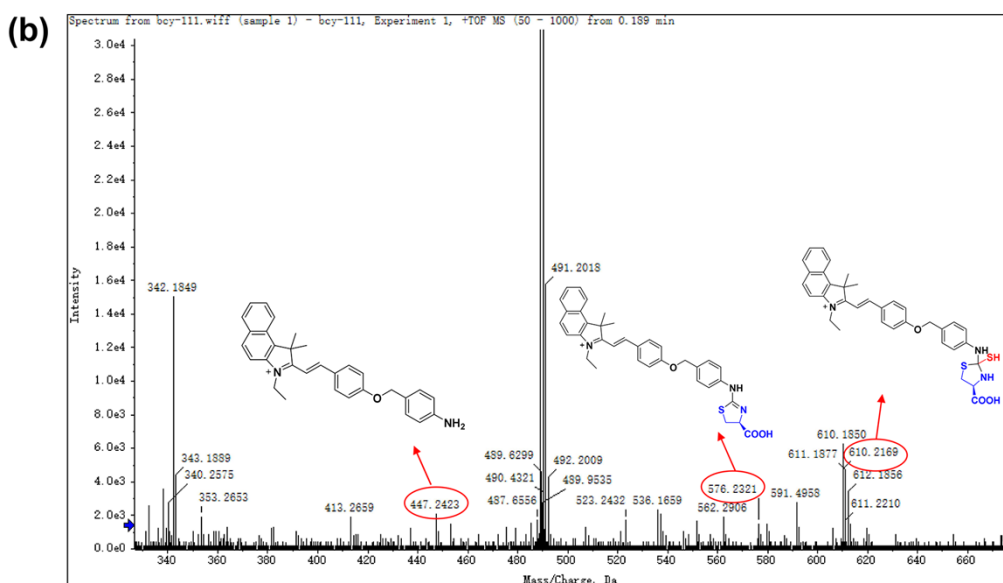



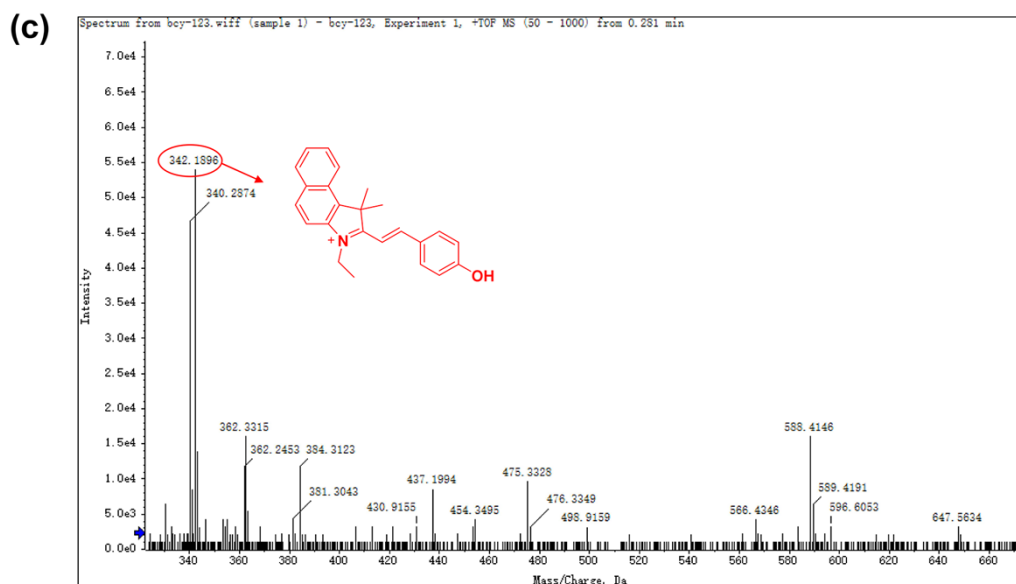

**Figure S2.** (a) ESI-MS spectrum of **Bcy-NCS** (10  $\mu$ M) after reacting with Cys (100  $\mu$ M) for 15 min; (b) magnified view of the selected region from (a); (c) ESI-MS spectrum of **Bcy-NCS** (10  $\mu$ M) after reacting with Cys (100  $\mu$ M) for 1 h. Test mode: positive ion mode

## 7. pH stability and biological media selectivity experiments of **Bcy-NCS**

A PBS buffer solution (pH = 7.4, 10 mM, 20% DMSO) containing 10  $\mu$ M of donor **Bcy-NCS** was prepared, divided into nine portions, and the pH of eight portions was adjusted to 3.5, 4.5, 5.5, 6.5, 8.5, 9.5, 10.5, and 11.5 using a pH meter. The Cys stock solution was added to each portion of the donor **Bcy-NCS** solution to achieve a final concentration of 400  $\mu$ M. After a 1 h incubation, the fluorescence intensity at 576 nm was measured. The measurements were repeated three times under each pH condition, and the corresponding scatter plots were generated.

Seventeen common biological mediators were selected, including cations ( $Mg^{2+}$ ,  $Fe^{2+}$ , and  $Fe^{3+}$ ), anions ( $S_2O_3^{2-}$ ,  $SO_3^{2-}$ ,  $SO_4^{2-}$ , and  $NO_2^-$ ), amino acids (Trp, Tyr, Phe, Gly, Lys, and Ser), biothiols (Hcy and GSH), as well as  $Na_2S \cdot 9H_2O$  and  $H_2O_2$ . All biological mediators were prepared as 50 mM stock solutions for later use. Sixteen separate portions of a PBS buffer solution (pH = 7.4, 10 mM, 20% DMSO) containing 10  $\mu$ M of donor **Bcy-NCS** were prepared, and each was supplemented with a different biological mediator to a final concentration of 400  $\mu$ M. After a 1 h incubation, the fluorescence emission spectra were measured. Each measurement was repeated three times for each biological mediator, and the corresponding curves and histograms were generated.

## 8. H<sub>2</sub>S release experiment of Bcy-NCS

### 8.1 MB method for testing H<sub>2</sub>S release

First, the H<sub>2</sub>S release standard curve was tested and plotted using the MB method.<sup>12</sup> The detection solution for the MB method consisted of 40% 30 mM ferric chloride, 40% 20 mM *N,N*-dimethyl-1,4-phenylenediamine sulfate, and 20% 1% w/v zinc acetate. The detection mechanism is detailed in **Scheme S3**. Next, Na<sub>2</sub>S standard solutions were prepared: Na<sub>2</sub>S·9H<sub>2</sub>O was dissolved in deionized water to prepare a 5 mM Na<sub>2</sub>S stock solution, which was then diluted with PBS buffer (pH = 7.4, 10 mM, 20% DMSO) to obtain Na<sub>2</sub>S solutions at concentrations of 0, 5, 10, 20, 40, 60, and 80 μM. 2 mL of each Na<sub>2</sub>S solution was placed in a labeled brown vial, and 1 mL of the MB assay solution was added. The reaction was conducted at room temperature and protected from light for 30 min. After the reaction, 200 μL of the reaction mixture was transferred into a 96-well plate, with three replicate wells, and the absorbance at 670 nm was measured using a microplate reader. The experiment was repeated three times in parallel, and the absorbance curves of Na<sub>2</sub>S concentration at 670 nm were plotted. The linear regression equations of the curves were calculated and combined.

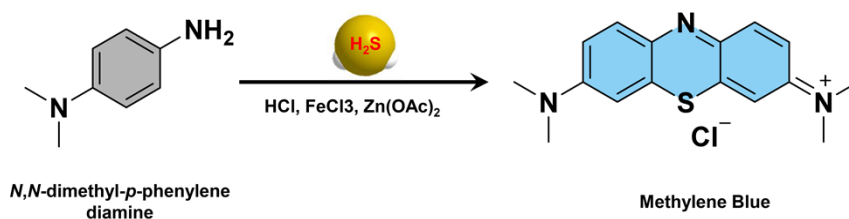

**Scheme S3.** Mechanism of H<sub>2</sub>S detection by MB method

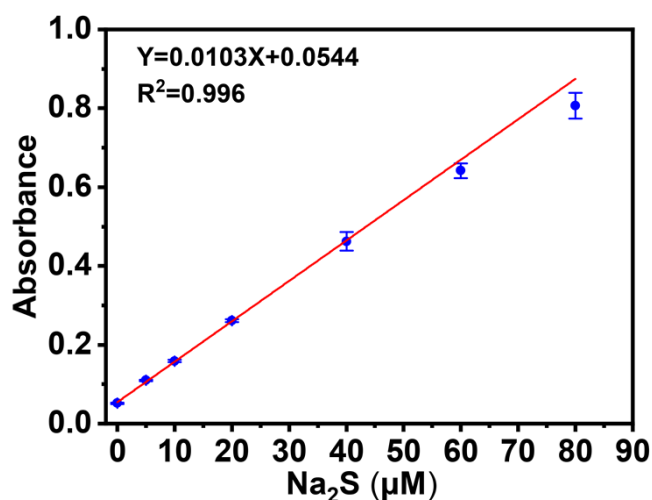

**Figure S3.** Calibration curve for H<sub>2</sub>S determined by the MB method. Test conditions: absorbance measured at 670 nm in PBS buffer (pH 7.4, 10 mM, 20% DMSO) at 37 °C.

The release of H<sub>2</sub>S from donor **Bcy-NCS** was subsequently tested. A PBS buffer solution (pH = 7.4, 10 mM, 20% DMSO) containing 10 μM of donor **Bcy-NCS** was prepared, and the Cys stock solution was added to achieve a final concentration of 100 μM. 2 mL of the donor mixture were placed in labeled brown penicillin vials, and six groups were set up in parallel, each corresponding to a specific incubation time point. The reaction mixtures were incubated at 37 °C for 0.5, 1, 2, 4, 6, and 8 h. After each incubation period, 1 mL of the MB assay solution was added to the vials, and the reaction was conducted at room temperature for 30 min, protected from light. After the reaction, 200 μL of the reaction solution was transferred into a 96-well plate with three replicate wells, and the absorbance at 670 nm was measured using a microplate reader. The experiments were repeated three times in parallel, and the measured absorbance was then converted to the corresponding H<sub>2</sub>S concentration using the H<sub>2</sub>S release standard curve. Scatter plots of H<sub>2</sub>S concentration versus incubation time were then generated.

## 8.2 Verification of H<sub>2</sub>S release by fluorescent probe method

The classical H<sub>2</sub>S fluorescent probe **AzMC** was selected to verify the ability of the donor **Bcy-NCS** to release H<sub>2</sub>S. **AzMC** was synthesized following a reported procedure<sup>13</sup>, and its structure was confirmed by NMR (Figure S14 and S15). The detection mechanism of **AzMC** is detailed in **Scheme S4**.

Four experimental setups were established: **AzMC**, **AzMC** + Cys, **AzMC** + **Bcy-NCS**, and **AzMC** + **Bcy-NCS** + Cys. The concentrations of the compounds were as follows: **AzMC** (10 μM), **Bcy-NCS** (10 μM), and Cys (100 μM). **Bcy-NCS** was incubated with Cys at 37 °C for 2 h, after which **AzMC** was added, and the reaction was protected from light. Following incubation with Cys for 2 h at 37 °C, **AzMC** was added, and the mixture was allowed to react for 30 min under light protection; similarly, **AzMC**, **AzMC** + Cys, and **AzMC** + **Bcy-NCS** were incubated for 30 min as controls. After the reaction, the fluorescence intensity was measured using a fluorescence spectrophotometer, with an excitation wavelength of 350 nm and a detection range of 400-500 nm.

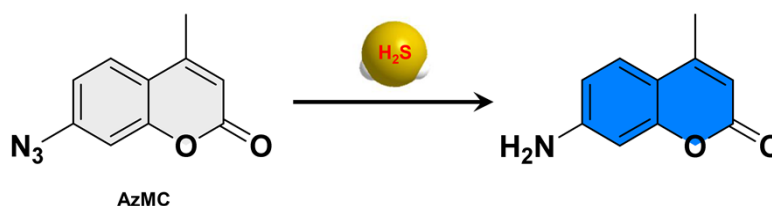

**Scheme S4.** **AzMC** mechanism for detecting H<sub>2</sub>S

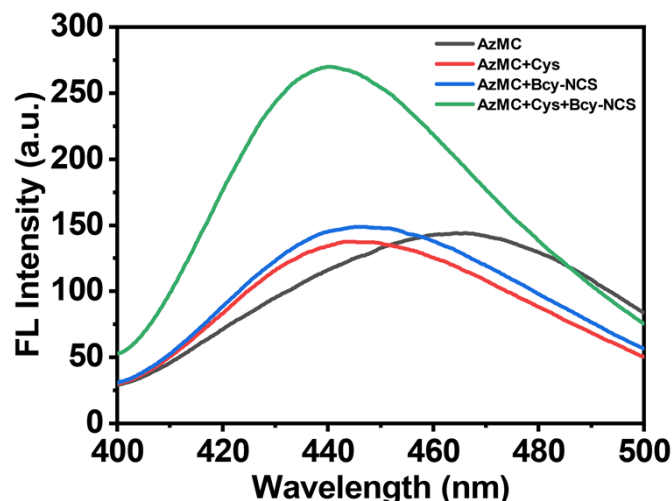

**Figure S4.** Fluorescence emission spectra of AzMC (10  $\mu\text{M}$ ) reacting with Cys (100  $\mu\text{M}$ ), Bcy-NCS (10  $\mu\text{M}$ ), and the mixture of Cys (100  $\mu\text{M}$ ) and Bcy-NCS (10  $\mu\text{M}$ ). Test conditions:  $\lambda_{\text{ex}} = 350$  nm, slit width: 5/5 nm, in PBS buffer (pH 7.4, 10 mM, 20% DMSO) at 37  $^{\circ}\text{C}$ .

## 9. Cell culture and cytotoxicity assays

HaCat or RAW 264.7 cells were cultured in DMEM medium containing 10% heat-inactivated fetal bovine serum (FBS) and 1% penicillin/streptomycin at 37  $^{\circ}\text{C}$  in a 5%  $\text{CO}_2$  environment.

HaCat or RAW 264.7 cells were seeded in 96-well plates and cultured at 37  $^{\circ}\text{C}$  in a 5%  $\text{CO}_2$  environment. After the cells adhered, the original medium was discarded, and the cells were treated with DMEM containing different concentrations of the drug for 12 or 24 h. After incubation, the old DMEM was discarded, and the cells were washed 1-2 times with PBS buffer. The CCK-8 solution was diluted 10-fold with DMEM, and 100  $\mu\text{L}$  of this solution was added to each well of the 96-well plates. The plates were then incubated for an additional 2-4 h at 37  $^{\circ}\text{C}$  in a 5%  $\text{CO}_2$  environment. Finally, the absorbance at 450 nm was measured using a microplate reader. Four replicate wells were set up for each drug concentration, and the experiment was repeated three times in parallel.

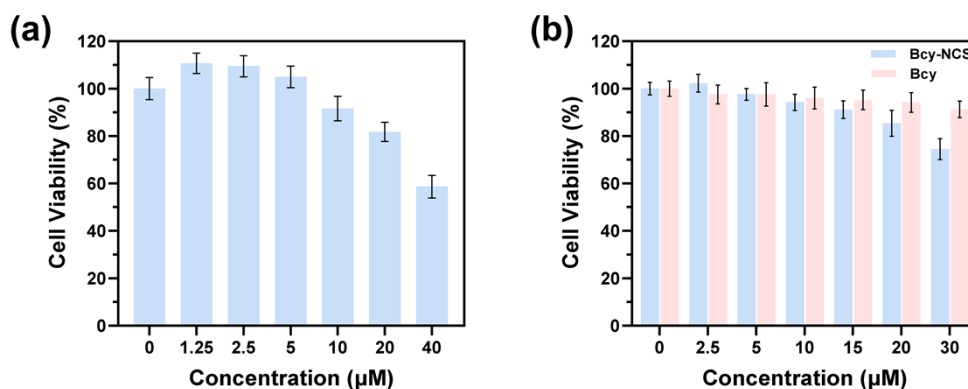

**Figure S5.** (a) Cell viability of HaCat cells after 12 h treatment with **Bcy-NCS**. (b) Cell viability of RAW 264.7 cells after 24 h treatment with **Bcy-NCS** or **Bcy**. Data are presented as the mean  $\pm$  SD from three independent experiments.

## 10. Cellular imaging experiments

The concentrations of compounds used for cell imaging were: **AzMC** (10  $\mu$ M), **Bcy-NCS** (10  $\mu$ M), Cys (400  $\mu$ M), and NEM (500  $\mu$ M).

HaCat cells were seeded in 96-well plates at a density of  $10^4$  cells per well and cultured overnight at 37 °C in a 5% CO<sub>2</sub> environment, with two plates set up in parallel. After the cells adhered to the plate, the original medium was discarded from both plates. The cells in one plate were divided into three groups and treated with DMEM containing only **Bcy-NCS**, DMEM containing **AzMC**, and DMEM containing **Bcy-NCS** + **AzMC**, respectively. The cells in the other plate were pretreated with NEM-containing DMEM for 1 h. After treatment, the old medium was discarded, and the cells were washed 2-3 times with PBS buffer. The cells were then divided into two groups and treated with DMEM containing **Bcy-NCS** + **AzMC** and DMEM containing **Bcy-NCS** + **AzMC** + Cys, respectively. **Bcy-NCS** was incubated for 1 h, Cys for 30 min, and **AzMC** for 30 min. After all incubations were completed, the cells were washed 2-3 times with PBS buffer. Finally, live cell imaging was performed using an inverted fluorescence microscope. Bright field images were recorded, red channel fluorescence images were collected using a green light excitation block, and blue channel fluorescence images were collected using a UV excitation block.

## 11. Anti-inflammatory studies of **Bcy-NCS**

The concentrations of compounds used for anti-inflammatory studies were as follows: LPS (500 ng/mL), **Bcy-NCS** (5, 10, 15  $\mu$ M), DEX (10  $\mu$ M), and **Bcy** (15  $\mu$ M).

RAW 264.7 cells were seeded in 96-well plates at a density of  $5 \times 10^4$  cells/well and cultured at 37 °C in a 5% CO<sub>2</sub> environment. After the cells adhered, the original medium was discarded, and the cells were divided into seven groups. The control group received no treatment, while the remaining six experimental groups were treated with LPS, LPS + **Bcy-NCS** (5  $\mu$ M), LPS + **Bcy-NCS** (10  $\mu$ M), LPS + **Bcy-NCS** (15  $\mu$ M), LPS + DEX, and LPS + **Bcy**, respectively, for 24 h.

The NO<sub>2</sub><sup>-</sup> levels in the cells were measured using a Griess reagent kit. In a new 96-well plate, 50  $\mu$ L of supernatant from the cell culture of each group, 25  $\mu$ L of Griess Reagent I, and 25  $\mu$ L of Griess Reagent II were sequentially added to each well (100  $\mu$ L total per well). The absorbance was measured at 540 nm, and nitrite levels were

calculated based on a standard curve. Three replicate wells were set up for each drug concentration, and the experiment was repeated three times in parallel.

## 12. NMR spectra and HRMS

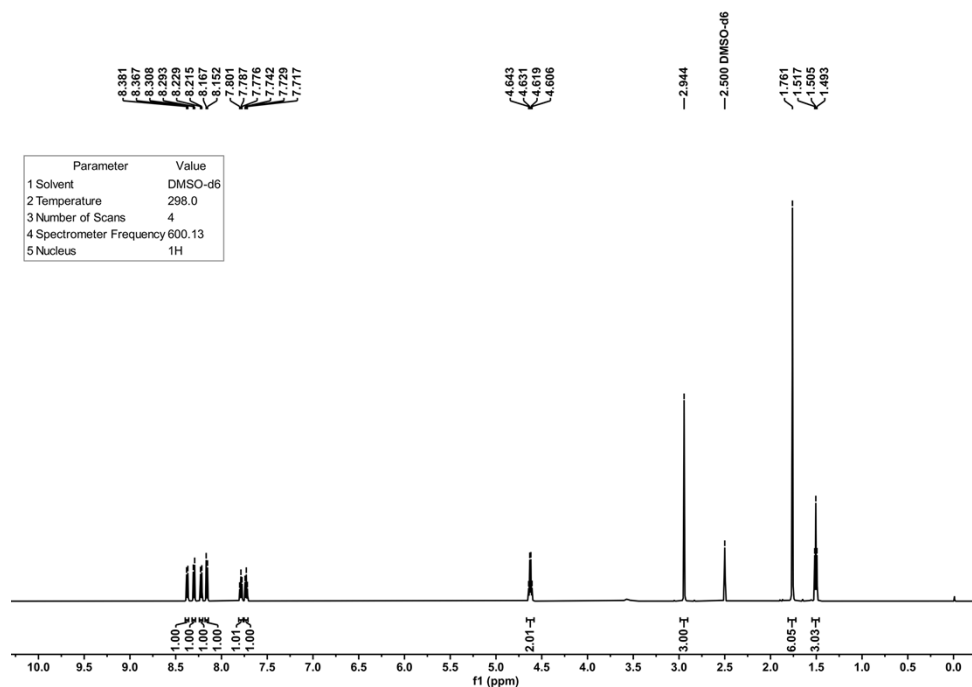

Figure S6.  $^1\text{H}$  NMR spectrum of **B-1** in  $\text{DMSO-}d_6$  (600 MHz)

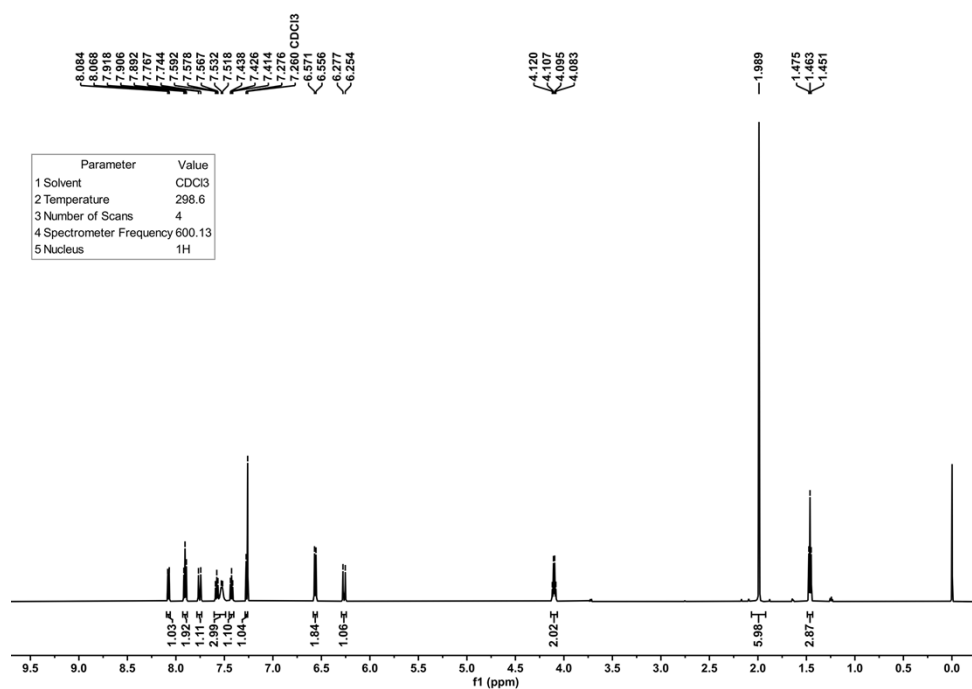

Figure S7.  $^1\text{H}$  NMR spectrum of **Bcy** in  $\text{CDCl}_3$  (600 MHz)

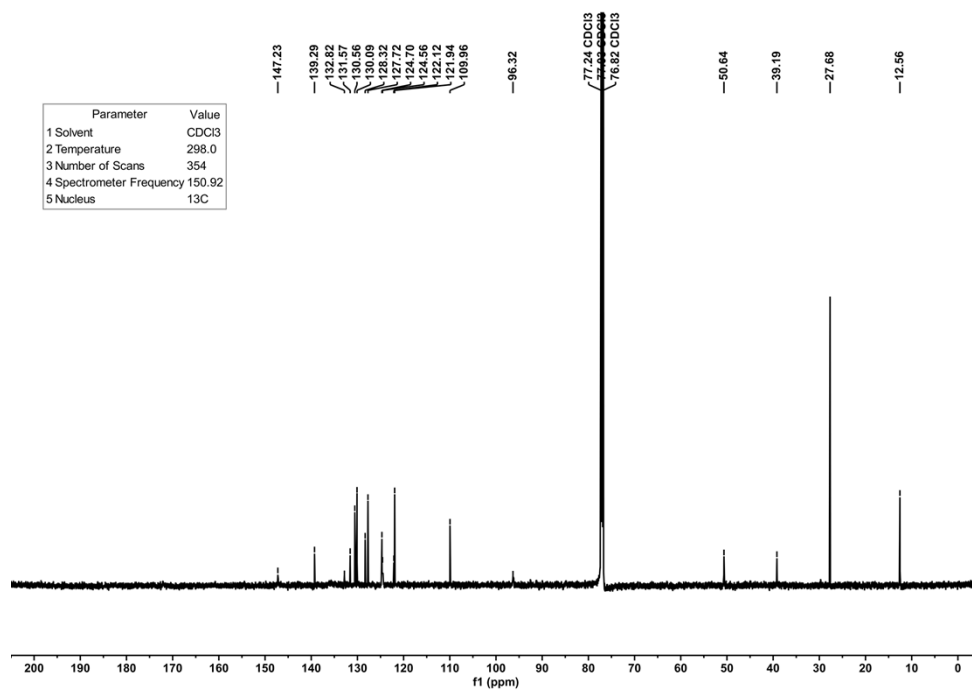

Figure S8. <sup>13</sup>C NMR spectrum of **Bey** in CDCl<sub>3</sub> (150 MHz)

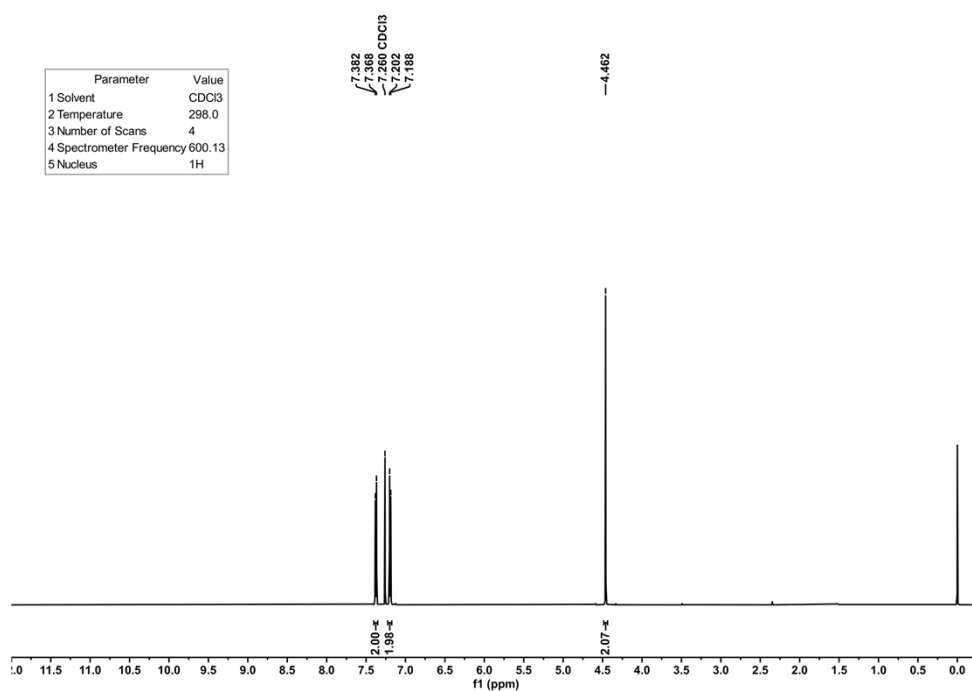

Figure S9. <sup>1</sup>H NMR spectrum of **Ar-NCS** in CDCl<sub>3</sub> (600 MHz)

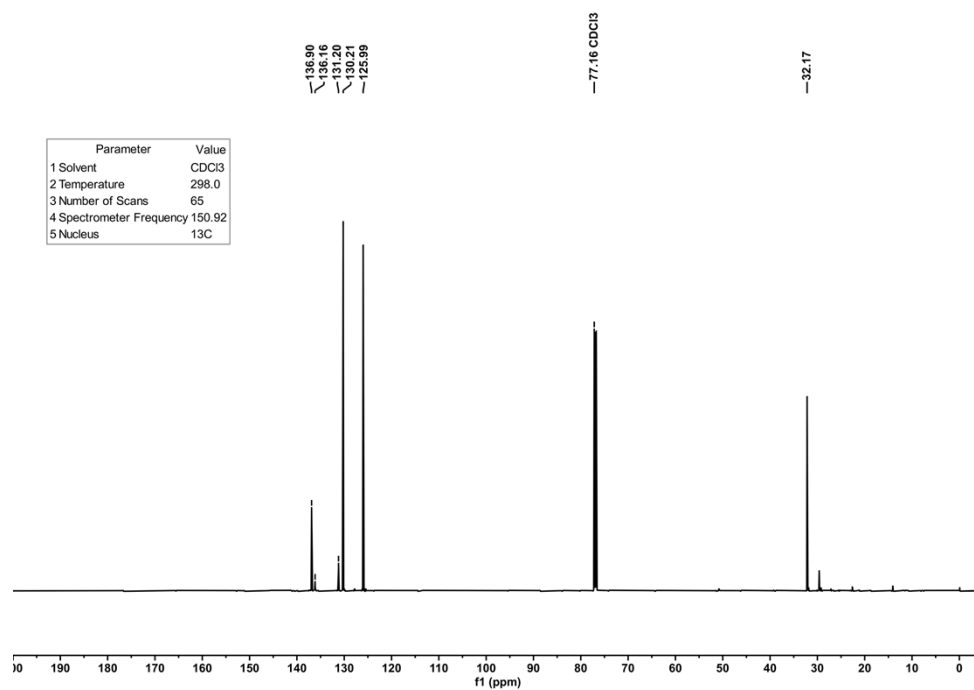

Figure S10.  $^{13}\text{C}$  NMR spectrum of Ar-NCS in  $\text{CDCl}_3$  (150 MHz)

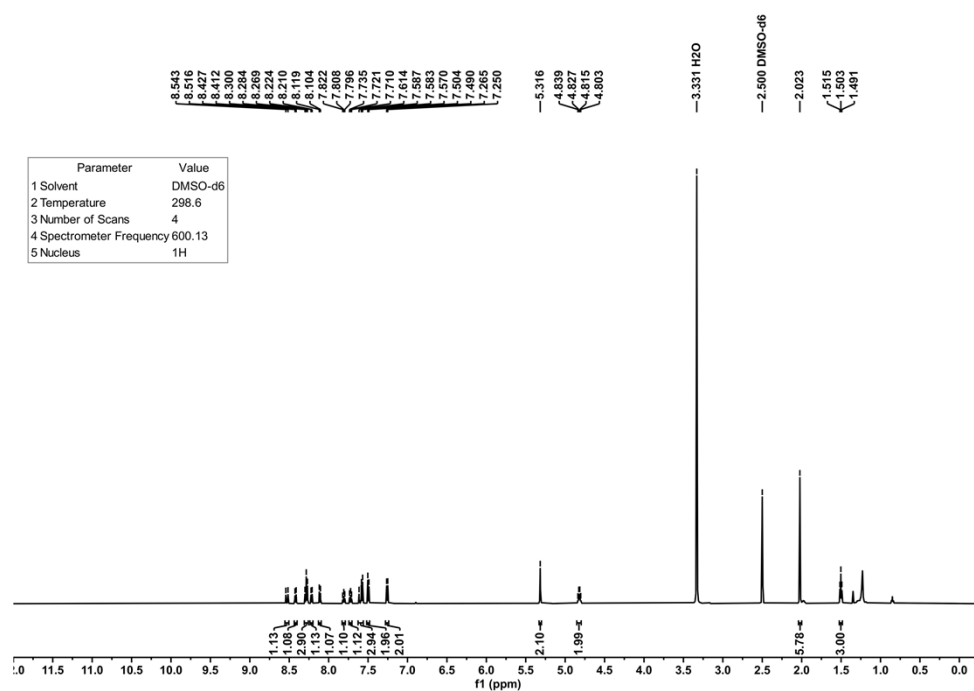

Figure S11.  $^1\text{H}$  NMR spectrum of Bey-NCS in  $\text{DMSO-}d_6$  (600 MHz)



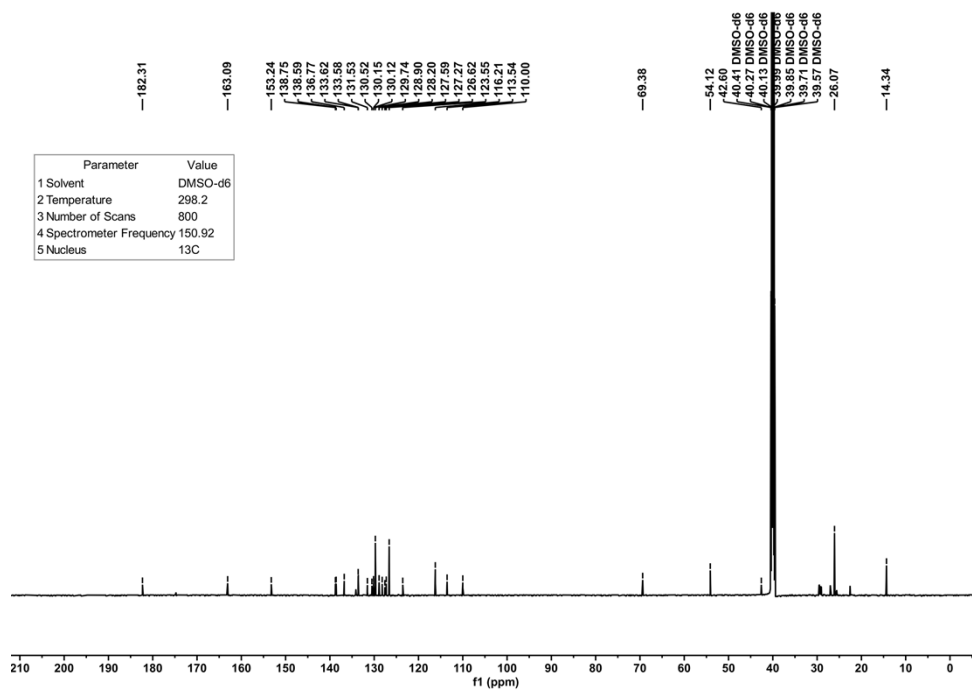

**Figure S12.**  $^{13}\text{C}$  NMR spectrum of **Bey-NCS** in  $\text{DMSO-}d_6$  (150 MHz)

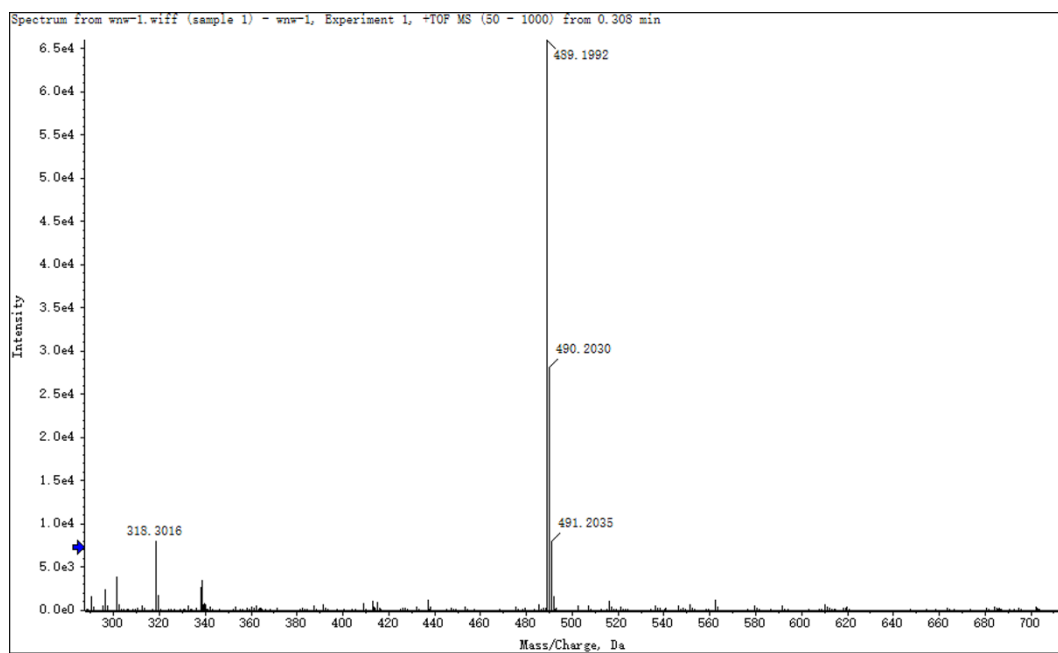

**Figure S13.** HRMS spectrum of **Bey-NCS**.

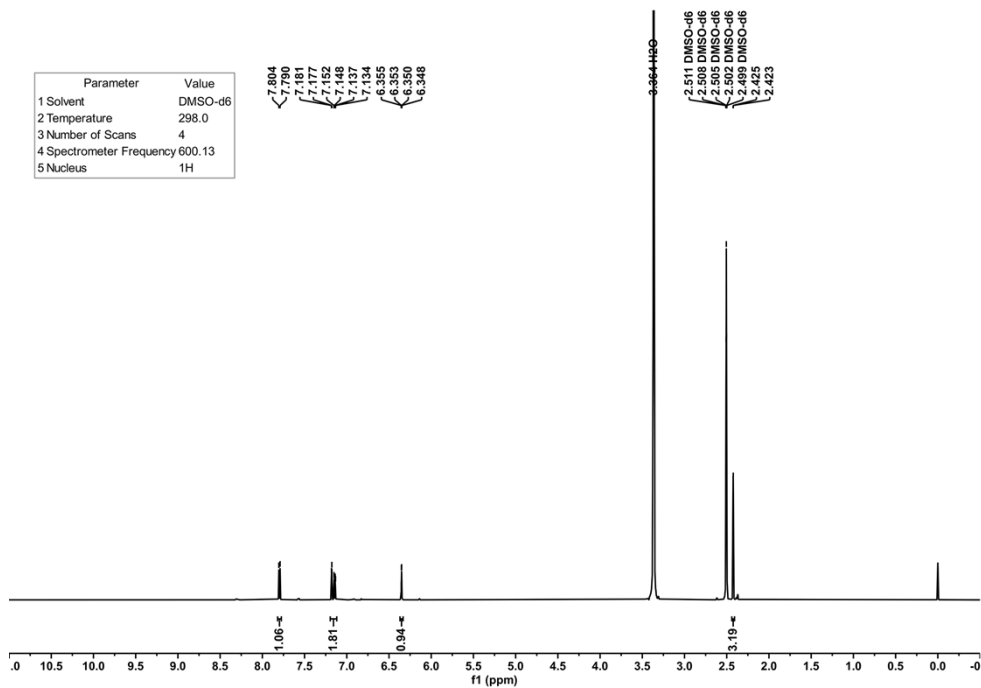

**Figure S14.**  $^1\text{H}$  NMR spectrum of AzMC in DMSO- $d_6$  (600 MHz)

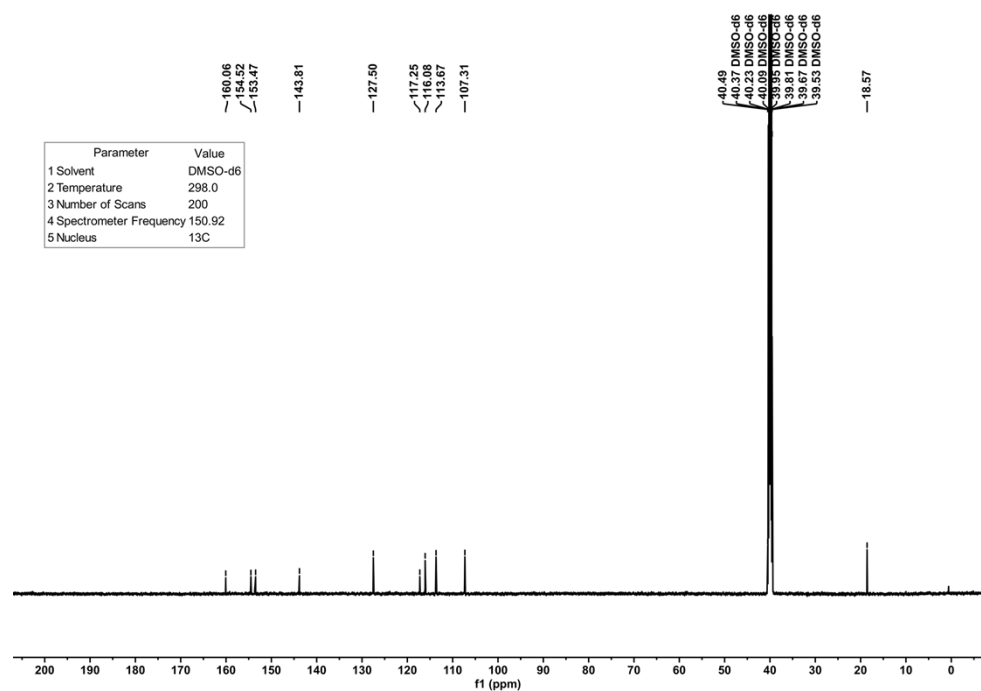

**Figure S15.**  $^{13}\text{C}$  NMR spectrum of AzMC in DMSO- $d_6$  (150 MHz)

### 13. References

1. J. Li, Y. Yue, F. Huo and C. Yin, *Dyes Pigm.*, 2019, **164**, 335-340.
2. K. Liu, H. Gu, Y. Sun, C. Xu, S. Yang and B. Zhu, *Food Chem.*, 2021, **356**, 129658.
3. Z. Chen, Q. Sun, Y. Yao, X. Fan, W. Zhang and J. Qian, *Biosens. Bioelectron.*, 2017, **91**, 553-559.
4. Q. Wu, J. Zhou, Y. Wu, C. Yu, E. Hao and L. Jiao, *New J. Chem.*, 2016, **40**, 1387-1395.
5. L. He, X. Yang, K. Xu and W. Lin, *Anal. Chem.*, 2017, **89**, 9567-9573.
6. X. Gao, X. Li, L. Li, J. Zhou and H. Ma, *Chem. Commun.*, 2015, **51**, 9388-9390.
7. L. Fan, W. Zhang, X. Wang, W. Dong, Y. Tong, C. Dong and S. Shuang, *Analyst*, 2019, **144**, 439-447.
8. X. Zhang, C. Liu, X. Cai, B. Tian, H. Zhu, Y. Chen, W. Sheng, P. Jia, Z. Li, Y. Yu, S. Huang and B. Zhu, *"Sens. Actuators, B"*, 2020, **310**, 127820.
9. J. Hou, P. Cai, C. Wang and Y. Shen, *Tetrahedron Lett.*, 2018, **59**, 2581-2585.
10. T. Yu, G. Yin, T. Niu, P. Yin, H. Li, Y. Zhang, H. Chen, Y. Zeng and S. Yao, *Talanta*, 2018, **176**, 1-7.
11. K. Søborg Pedersen, C. Baun, K. Michaelsen Nielsen, H. Thisgaard, A. Ingemann Jensen and F. Zhuravlev, *Molecules*, 2020, **25**.
12. N. O. Devarie-Baez, P. E. Bagdon, B. Peng, Y. Zhao, C.-M. Park and M. Xian, *Org. Lett.*, 2013, **15**, 2786-2789.
13. M. K. Thorson, T. Majtan, J. P. Kraus and A. M. Barrios, *Angew. Chem. Int. Ed.*, 2013, **52**, 4641-4644.
